# Supplementary material for: Numerical Study of Hydrodynamic Characteristics of Three-Dimensional Oscillating Water-Column Wave-Power Device
Source: Preprints.org preprint supplement (doi:10.20944/preprints202406.0843.v1), 2024-06-12
Supplement: Supplementary file 1 [file supplementary]

● Simulation aspects of wave forces on a fixed 3D OWC have been studied.

● Horizontal wave forces are much greater than vertical and lateral wave forces.

● The increase in wave height causes the horizontal wave force to increase linearly, while the vertical wave force increases by a factor of square.

●The highest dynamic water pressure was observed at the junction of the front wall with the water surface inside and outside the unit.
